# Supplementary material for: The PRIMAP-hist national historical emissions time series
Source: Copernicus journal article supplement (doi:10.5194/essd-2016-12), 2016-06-02

CAT0: National total

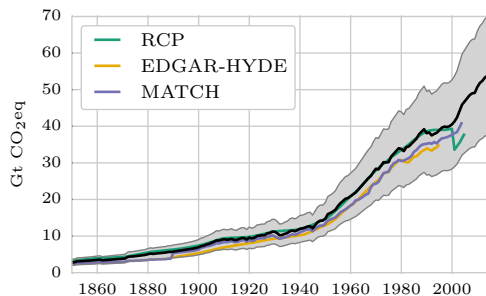

CAT1: Total energy

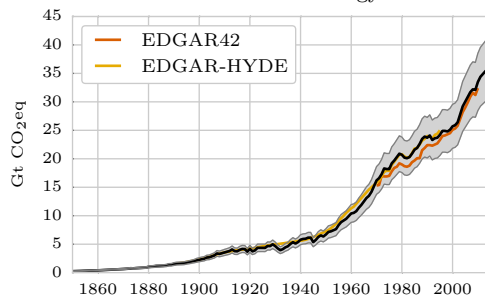

CAT2: Industrial processes

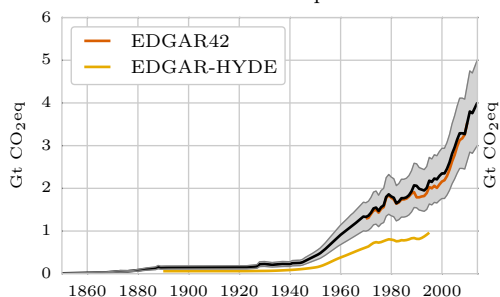

CAT3: Solvent and other product use

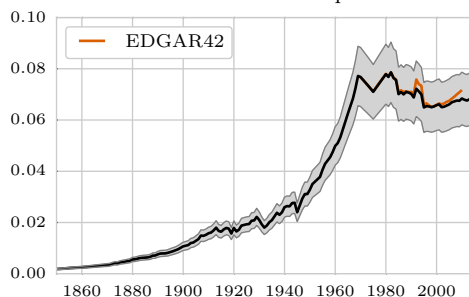

CAT4: Agriculture

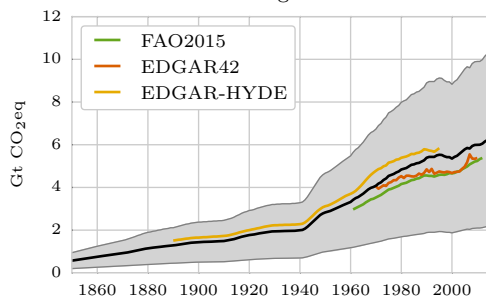

CAT5: Land-use, land-use change, forestry

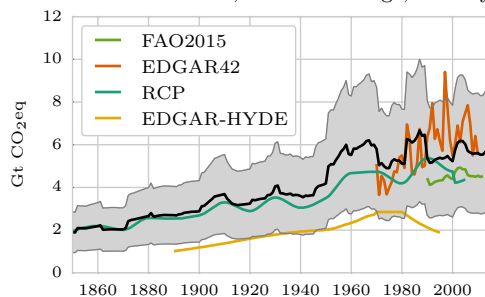

CAT6: Waste

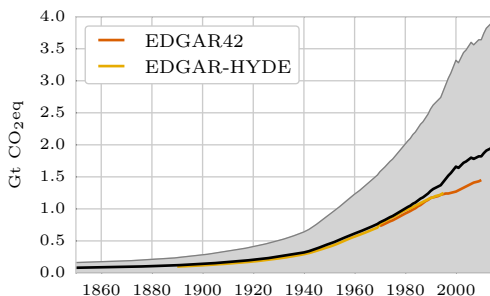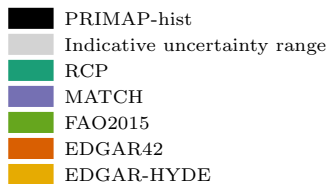

Supplement: Supplementary file [file essd-2016-12-SC1-supplement.zip]
