# Supplementary material for: The PRIMAP-hist national historical emissions time series
Source: Copernicus journal article supplement (doi:10.5194/essd-2016-12), 2016-06-02

CO<sub>2</sub>, CATM0EL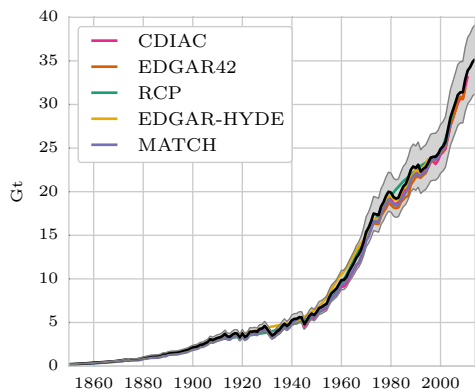CO<sub>2</sub>, CAT5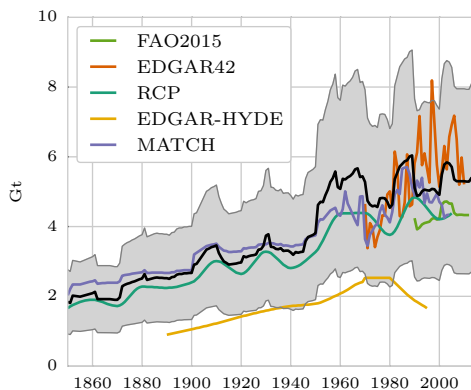CH<sub>4</sub>, CAT0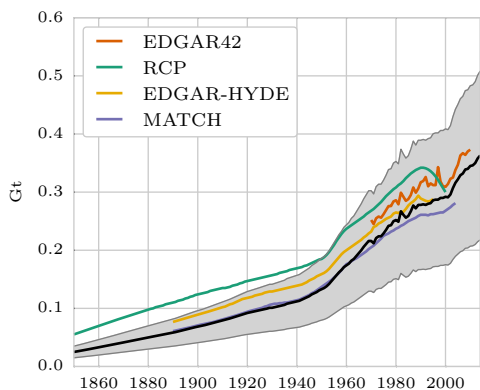N<sub>2</sub>O, CAT0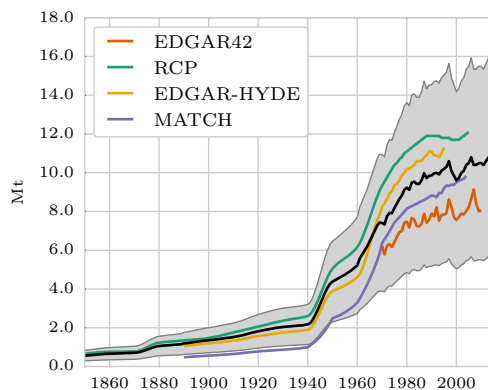

F-GASES (AR4-GWP), CAT0

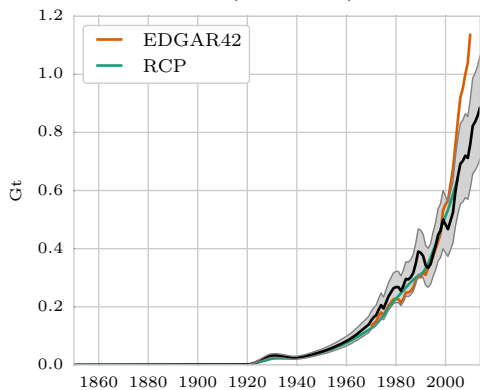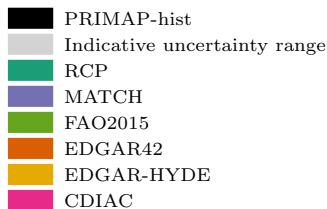

Supplement: Supplementary file [file essd-2016-12-SC1-supplement.zip]
