# Supplementary material for: The PRIMAP-hist national historical emissions time series
Source: Copernicus journal article supplement (doi:10.5194/essd-2016-12), 2016-06-02

World

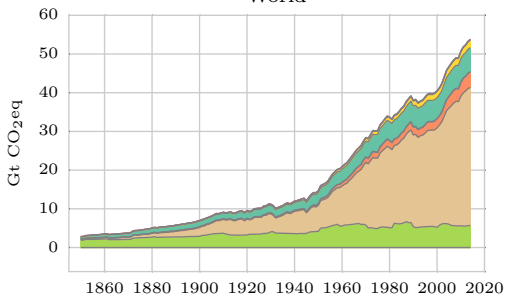

United States

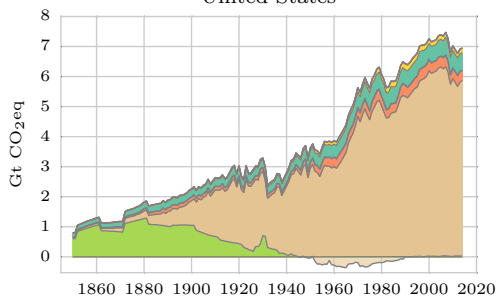

China

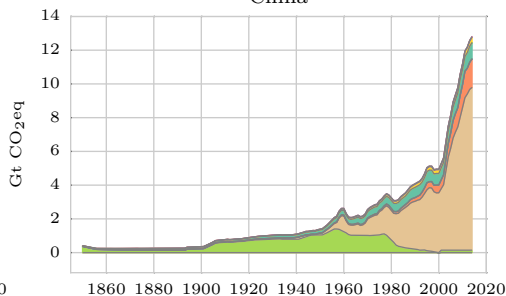

European Union (EU28)

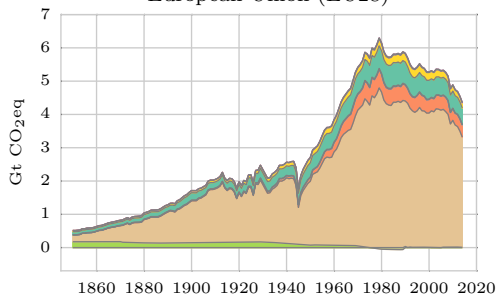

India

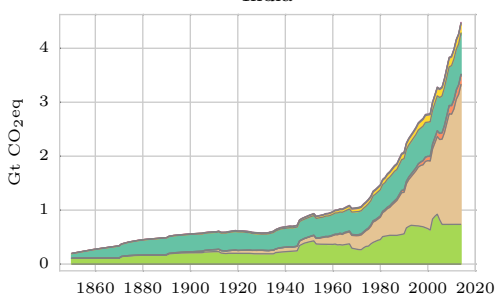

Japan

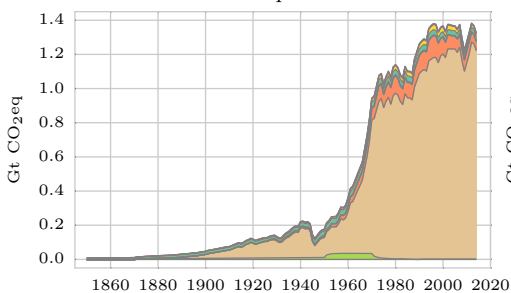

Brazil

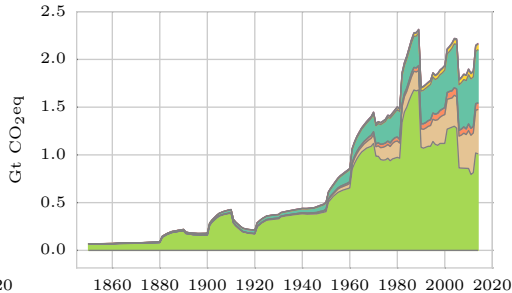

Supplement: Supplementary file [file essd-2016-12-SC1-supplement.zip]
