# Supplementary material for: The PRIMAP-hist national historical emissions time series
Source: Copernicus journal article supplement (doi:10.5194/essd-2016-12), 2016-06-02

Starting with UNFCCC2015

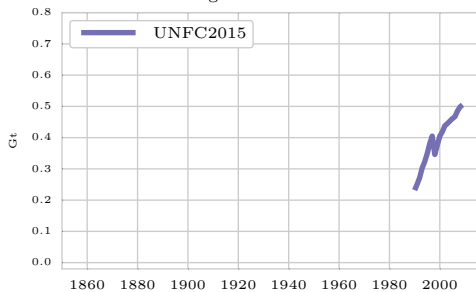

Extending with trend from BUR2015

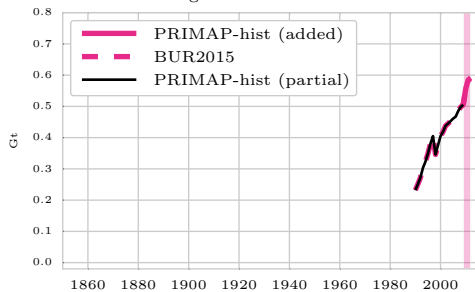

Extending with trend from CDIAC2015

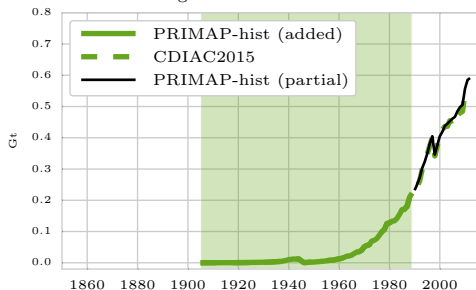

No changes through EDGAR42

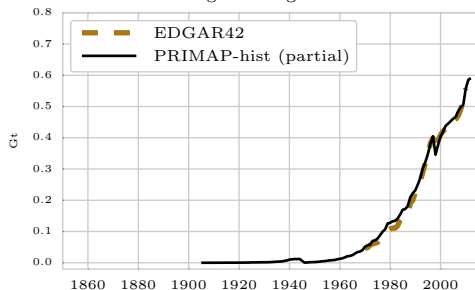

Extending with trend from BP2015

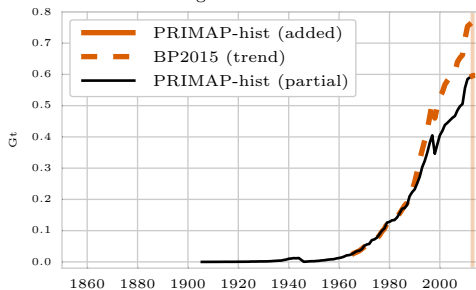

Extending with regional trend from EDGARHYDE

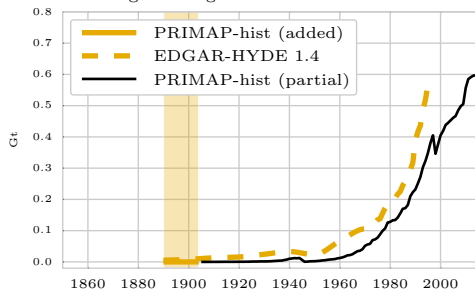

Extending with global trend from RCP

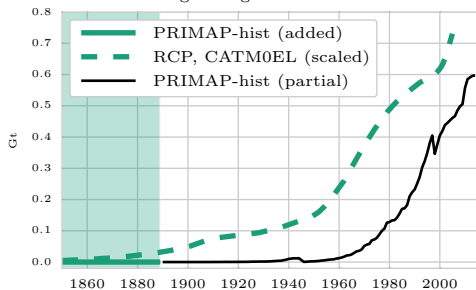

Complete composite source

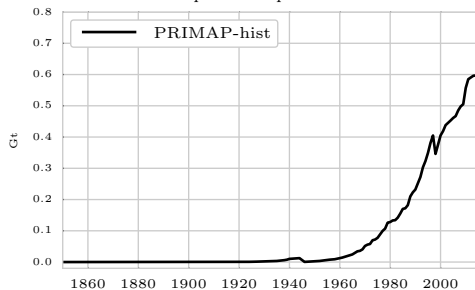

Supplement: Supplementary file [file essd-2016-12-SC1-supplement.zip]
